# Supplementary material for: Antimicrobial Resistance and Genetic Lineages of Staphylococcus aureus from Wild Rodents: First Report of mecC-Positive Methicillin-Resistant S. aureus (MRSA) in Portugal
Source: MDPI journal article supplement (doi:10.3390/ani11061537), 2021-05-25
Supplement: s1 [file s1]

**Table S1.** Location and specific characteristics of wild rats captured in port areas of Lisbon and Ponta Delgada (S. Miguel island, Azores) positive for *S. aureus*.

| Isolate | Species                  | City          | Latitude  | Longitude  | Date     | Sex | Age      |
|---------|--------------------------|---------------|-----------|------------|----------|-----|----------|
| VS2808  | <i>Rattus rattus</i>     | Ponta Delgada | 37.750180 | -25.593951 | 12/11/19 | F   | Adult    |
| VS2809  | <i>Rattus rattus</i>     | Ponta Delgada | 37.750180 | -25.593951 | 13/11/19 | M   | Adult    |
| VS2810  | <i>Rattus norvegicus</i> | Ponta Delgada | 37.80241  | -25.66391  | 28/11/19 | M   | Adult    |
| VS2811  | <i>Rattus rattus</i>     | Lisbon        | 38.693644 | -9.226419  | 04/07/19 | M   | Adult    |
| VS2812  | <i>Rattus rattus</i>     | Lisbon        | 38.74608  | -9.17191   | 31/07/19 | M   | Adult    |
| VS2813  | <i>Rattus rattus</i>     | Lisbon        | 38.693644 | -9.226419  | 25/06/19 | M   | Adult    |
| VS2814  | <i>Rattus norvegicus</i> | Lisbon        | 38.70691  | -9.23245   | 16/10/19 | F   | Adult    |
| VS2815  | <i>Rattus norvegicus</i> | Lisbon        | 38.70691  | -9.23245   | 16/10/19 | M   | Juvenile |
| VS2816  | <i>Rattus norvegicus</i> | Lisbon        | 38.70691  | -9.23245   | 31/10/19 | M   | Adult    |
| VS2817  | <i>Rattus rattus</i>     | Lisbon        | 38.70691  | -9.23245   | 31/10/19 | M   | Juvenile |
| VS2818  | <i>Rattus norvegicus</i> | Lisbon        | 38.70691  | -9.23245   | 05/11/19 | M   | Adult    |
| VS2819  | <i>Rattus rattus</i>     | Lisbon        | 38.70691  | -9.23245   | 29/10/19 | F   | Juvenile |
| VS2820  | <i>Rattus norvegicus</i> | Lisbon        | 38.70691  | -9.23245   | 08/11/19 | F   | Adult    |
| VS2821  | <i>Rattus norvegicus</i> | Lisbon        | 38.700149 | -9.176651  | 27/06/19 | M   | Adult    |
| VS2822  | <i>Rattus norvegicus</i> | Lisbon        | 38.700149 | -9.176651  | 04/07/19 | F   | Adult    |
| VS2823  | <i>Rattus norvegicus</i> | Lisbon        | 38.700149 | -9.176651  | 04/07/19 | M   | Adult    |
| VS2824  | <i>Rattus norvegicus</i> | Lisbon        | 38.700149 | -9.176651  | 28/06/19 | F   | Adult    |
| VS2825  | <i>Rattus norvegicus</i> | Lisbon        | 38.700149 | -9.176651  | 04/07/19 | F   | Adult    |
| VS2826  | <i>Rattus rattus</i>     | Ponta Delgada | 37.74768  | -25.69987  | 13/11/19 | F   | Adult    |
| VS2827  | <i>Rattus norvegicus</i> | Ponta Delgada | 37.77244  | -25.66917  | 14/01/20 | F   | Adult    |
| VS2828  | <i>Rattus norvegicus</i> | Lisbon        | 38.78422  | -9.09148   | 13/02/20 | M   | Adult    |
| VS2829  | <i>Rattus rattus</i>     | Lisbon        | 38.78422  | -9.09148   | 27/02/20 | M   | Adult    |
| VS2830  | <i>Rattus norvegicus</i> | Ponta Delgada | 37.74962  | -25.68882  | 18/11/19 | F   | Adult    |

|               |                          |               |           |           |          |   |          |
|---------------|--------------------------|---------------|-----------|-----------|----------|---|----------|
| <b>VS2831</b> | <i>Rattus norvegicus</i> | Ponta Delgada | 37.74962  | -25.68882 | 18/11/19 | M | Adult    |
| <b>VS2832</b> | <i>Rattus norvegicus</i> | Lisbon        | 38.756484 | -9.161519 | 07/06/19 | M | Adult    |
| <b>VS2833</b> | <i>Rattus norvegicus</i> | Ponta Delgada | 37.74835  | -25.69694 | 18/11/19 | M | Juvenile |
| <b>VS2834</b> | <i>Rattus rattus</i>     | Lisbon        | 38.695068 | -9.225746 | 02/07/19 | F | Adult    |
| <b>VS2835</b> | <i>Rattus norvegicus</i> | Lisbon        | 38.7541   | -9.1925   | 20/02/20 | F | Juvenile |
| <b>VS2836</b> | <i>Rattus norvegicus</i> | Lisbon        | 38.70691  | -9.23245  | 29/10/19 | M | Adult    |
| <b>VS2837</b> | <i>Rattus norvegicus</i> | Ponta Delgada | 37.74962  | -25.68882 | 14/11/19 | M | Adult    |
| <b>VS2838</b> | <i>Rattus norvegicus</i> | Ponta Delgada | 37.75223  | -25.69187 | 29/11/19 | F | Adult    |
| <b>VS2839</b> | <i>Rattus norvegicus</i> | Ponta Delgada | 37.74962  | -25.68882 | 14/11/19 | F | Adult    |
| <b>VS2840</b> | <i>Rattus norvegicus</i> | Lisbon        | 38.74608  | -9.17191  | 09/09/19 | M | Adult    |
| <b>VS2841</b> | <i>Rattus norvegicus</i> | Lisbon        | 38.74608  | -9.17191  | 07/08/19 | F | Adult    |
| <b>VS2842</b> | <i>Rattus norvegicus</i> | Ponta Delgada | 37.7977   | -25.70772 | 17/01/20 | M | Adult    |
| <b>VS2843</b> | <i>Rattus rattus</i>     | Lisbon        | 38.7607   | -9.09702  | 12/02/20 | M | Juvenile |
| <b>VS2844</b> | <i>Rattus rattus</i>     | Lisbon        | 38.697153 | -9.229570 | 05/07/19 | M | Adult    |
| <b>VS2845</b> | <i>Rattus norvegicus</i> | Lisbon        | 38.703235 | -9.177966 | 10/07/19 | M | Juvenile |
